1

## 2 **PANOPLY: Omics-guided drug prioritization method tailored to an individual patient**

3 Krishna R. Kalari<sup>1,§,\*</sup>, Jason P. Sinnwell<sup>1,§</sup>, Kevin J. Thompson<sup>1</sup>, Xiaojia Tang<sup>1</sup>, Erin E. Carlson<sup>1</sup>, Jia Yu<sup>4</sup>, Peter T. Vedell<sup>1</sup>, James N. Ingle<sup>3</sup>,  
4 Richard M. Weinshilboum<sup>4</sup>, Judy C. Boughey<sup>2</sup>, Liewei Wang<sup>4</sup>, Matthew P. Goetz<sup>3,4</sup>, Vera Suman<sup>1,\*</sup>.

5 <sup>1</sup>Department of Health Sciences Research, <sup>2</sup> Department of Surgery, <sup>3</sup> Division of Medical Oncology, <sup>4</sup> Department of Molecular Pharmacology  
6 and Experimental Therapeutics, Mayo Clinic, Rochester 55905 USA

7 § Co-first authors

8 \* To whom correspondence should be addressed.

### 9 **Corresponding authors:**

10 Krishna R Kalari, Department of Health Sciences Research, Mayo Clinic, 200 First Street SW, Rochester, MN 55905, USA; Tel: 507-538-4602;  
11 Email: [Kalari.Krishna@mayo.edu](mailto:Kalari.Krishna@mayo.edu)

12 Vera J Suman, Department of Health Sciences Research, Mayo Clinic, 200 First Street SW, Rochester, MN 55905, USA; Tel: 507-538-4602;  
13 Email: [suman@mayo.edu](mailto:suman@mayo.edu)

14

15

16

17

18

19

20

21 **ABSTRACT**

22 **Purpose** The majority of cancer patients receive treatments that are minimally informed by omics data. Our goal was to develop a precision  
23 medicine computational framework (PANOPLY: **P**recision **c**ancer **g**enomic **r**eport: single **s**ample **i**nventory) to identify and prioritize drug targets  
24 and cancer therapy regimens.

25 **Methods** The PANOPLY approach integrates clinical data with germline and somatic features obtained from multi-omics platforms, and apply  
26 machine learning, and network analysis approaches in the context of the individual patient and matched controls. The PANOPLY workflow  
27 employs four steps (i) selection of matched controls to the case of interest (ii) identification of case-specific genomic events (iii) identification of  
28 suitable drugs using the driver-gene network and random forest analyses and (iv) provide an integrated multi-omics case report of the patient with  
29 prioritization of anti-cancer drugs.

30 **Results** The PANOPLY workflow can be executed on a stand-alone virtual machine and is also available for download as an R package. We  
31 applied the method to an institutional breast cancer neoadjuvant chemotherapy study which collected clinical and genomic data as well as patient-  
32 derived xenografts (PDXs) to investigate the prioritization offered by PANOPLY. In a chemotherapy-resistant PDX model, we found that that the  
33 prioritized drug, olaparib, was more effective than placebo at treating the tumor ( $P < 0.05$ ). We also applied PANOPLY to in-house and publicly  
34 accessible multi-omics tumor datasets with therapeutic response or survival data available.

35 **Conclusion** In summary, PANOPLY prioritizes drugs based on both clinical and multi-omics data, and it can aid oncologists in their decision-  
36 making to effectively treat an individual patient.

## 37 INTRODUCTION

38 There has been substantial progress in the fight against cancer; however, cancer remains the second leading cause of death in the United States <sup>1</sup>. A  
39 major focus of cancer research has been the identification of oncogenic drivers and the development of drugs that selectively target those driver  
40 events. This approach has led to the development of agents that have been shown to successfully target the driver mutational events such as:  
41 trastuzumab, which targets *HER2+* breast cancer <sup>2,3</sup>, imatinib, which inhibits the *BCR-ABL1* tyrosine kinase produced by the Philadelphia  
42 translocation in chronic myelogenous leukemia <sup>4</sup>, vemurafenib for the treatment of *BRAF* V600E mutant malignant melanoma <sup>5</sup>, agents targeting  
43 *EGFR* mutations non-small cell lung carcinoma and <sup>6</sup>, and crizotinib for non-small cell lung cancer with *ALK* rearrangements <sup>7</sup>.

44 The mapping of the human genome has opened the door to the exploration of the tumor and environmental features to uncover the drivers of  
45 cancer and its resistance to treatment. A number of commercial gene sequencing platforms (e.g., Foundation One, Ambry Genetics) have been  
46 developed to identify tumor mutations used in clinical decision making. Most of these platforms are focused on detecting a limited number of gene  
47 abnormalities in specific genes and do not include comprehensive “multi-omics” data analysis. For many tumor types, this leads to the inability to  
48 link mutational drivers with druggable targets. A pressing need exists for better approaches to identify right drugs for an individual patient  
49 utilizing multi-omics data. While most of the studies utilize single omics data type to predict drug response, there are algorithms that use two or  
50 more genomic features to predict drug response in cancer cell lines <sup>8-10</sup> and in The Cancer Genome Atlas (TCGA) subsets <sup>11</sup>. There are databases  
51 such as MD Anderson’s Personalized Cancer Therapy <sup>12</sup>, Vanderbilt’s My Cancer Genome <sup>13</sup>, the Broad Institute’s TARGET <sup>14</sup>, TCGA <sup>15</sup>, and the  
52 Catalogue of Somatic Mutations in Cancer (COSMIC) <sup>16</sup> containing information on the frequency of alterations in thousands of patients with  
53 cancer. Programs such as DriverNet <sup>17</sup>, IntOGen <sup>18</sup>, analyze a single type of omics data, such as somatic mutations, to identify potential driver  
54 genes. Other programs, such as XSeq <sup>19</sup>, OncoRep <sup>20</sup>, OncoIMPACT <sup>21</sup>, and iCAGES <sup>22</sup> integrate on somatic mutations and/or copy number

55 alterations (CNAs), and/or gene expression. Although integrating these data types represents substantial progress toward the full molecular  
56 characterization needed for precision cancer care, no comprehensive method for integrating clinical and multi-omics data has yet been developed  
57 and validated for selecting the most compatible agents for a given patient's -omics profile. Thus, we have developed a workflow called  
58 PANOPLY (**P**recision **c**ancer **g**enomic **r**eport: single sample inventory) that identifies molecular alterations that are unique to a cancer patient  
59 compared to matched-controls with similar disease characteristics who had a favorable clinical course and then performs a comprehensive,  
60 integrated multi-omics analysis to identify druggable genomic events for an individual's tumor. The results are summarized in a report which the  
61 patient's medical oncology team can use the data to choose the particular agent to be administered.

62 In brief, PANOPLY uses machine learning and knowledge-driven network analysis to analyze patient-specific alterations (CNA, germline and  
63 somatic alterations from DNA, and RNA gene expression and expressed mutations) driving oncogenesis and prioritizes drugs which target the  
64 networks and pathways associated with these cancer-driving alterations. We describe the workflow and provide examples using both institutional  
65 and publicly-available datasets where PANOPLY was used to identify drugs for individual patients and subgroups of patients whose disease is  
66 resistant to standard chemotherapy. We validated these drugs in a patient with chemo-resistant triple-negative breast cancer (TNBC) using patient-  
67 derived xenografts (PDXs) by testing the top drugs for that patient.

68

69

70

71

72

## 73 **MATERIALS AND METHODS**

### 74 **Data Sources**

75 *Simulation Data:* Data was simulated from multivariate normal (MVN) distribution for samples using the mean and covariance structure based on  
76 20 non-cancer tissue samples. The samples were collected by the Susan G. Komen Tissue Bank (phs000644.v1.p1) and SOLID RNA-Seq data was  
77 normalized and provided by Dr. Milan Radovich from Indiana University<sup>23</sup>.

78

79 *TCGA with a clinical follow-up:* Clinical and processed multi-omics data for breast and colon cancers were downloaded from Synapse and CGHub  
80 <sup>24</sup> and other TCGA repositories. Specifically in this study, we utilized 1) 94 breast cancer normal-adjacent samples gene expression data 2)  
81 Normalized copy number and gene expression TCGA colon cancer (COAD) data (<https://www.synapse.org/#!Synapse:syn274420>). We restricted  
82 the COAD data to male patients age 45-70 with Stage II or higher disease. We selected a patient who died within 155 days of initial diagnosis of  
83 colon cancer and compared with five disease-free matched-controls.

84 *Mayo Clinic Neo-Adjuvant Triple Negative Breast Cancer (TNBC) Patients (BEAUTY Study):* We utilized 36 basal TNBC patients from a  
85 neoadjuvant clinical trial <sup>25</sup> for whom DNA, RNA sequencing and drug response to chemotherapy was available. As described in Goetz et al.2017,  
86 there were 19 chemo-sensitive and 17 chemo-resistant TNBC patients. PDX models were established for 16 TNBC patients before  
87 chemotherapy<sup>26</sup>, which were used for experimental validation of PANOPLY.

88 *Curated Knowledge Datasets for PANOPLY Workflow:* We used the three sources to curate cancer-specific knowledge networks in PANOPLY;  
89 briefly, 844 cancer genes<sup>27-29</sup> described in Figure\_S1, and gene-gene interactions<sup>30</sup> and cancer drug-gene interactions<sup>31</sup> are described in the  
90 Supplementary Methods.

### 91 **PANOPLY workflow**

92 The PANOPLY workflow is available for download as an R package from <http://bioinformaticstools.mayo.edu/research/panoply/>. A high-level  
93 overview of the workflow is shown in Figure 1, which we briefly describe below. The details of each step are provided in the Supplementary  
94 Methods.

95  
96 *Input:* The minimum input required for PANOPLY is normalized gene expression data for a patient and for a set of clinically similar cancer  
97 patients who differ in regards to the phenotype of interest (e.g., response or survival time). Multi-omics data for patients such as CNA, somatic  
98 mutations, and/or germline variants, and expressed variants can be provided as additional inputs to PANOPLY.

#### 99 *Steps:*

- 100 1. *Selection of matched controls for a case:* For a patient of interest, the user selects a matched set of controls defined by the phenotype of  
101 interest. Matching algorithms are not provided within the workflow, but we provide examples of how we constructed for our studies.
- 102 2. *Patient-Specific Genomic Events:* Using the pre-processed data provided (mandatory: expression data, and optional: somatic, germline, copy  
103 number, and/or expressed alterations), patient-specific genomic alterations that are different from the matched-controls are identified.

- 104 3. *Identification of suitable drugs using driver-gene networks and random forest analyses:* We apply two network-based tests for drugs to be  
105 prioritized for the patient: Drug Network Test (DNT) and Drug Meta Test (DMT). The sum of the negative log<sub>10</sub> p-values from these tests is  
106 provided as a score for each drug (P.score). In addition, we apply random forest method to identify multi-omics features that distinguish the  
107 case from the matched-controls, which we aggregate by drugs that target those events into a score (RF.score). These tests are detailed in the  
108 Supplementary Methods.
- 109 4. *Integrated Multi-Omics Case Report:* The integrated multi-omics and drug prioritization data are presented as actionable information to a  
110 clinician.

#### 111 *False Positive Rate (FPR) Simulations*

112 We used 94 adjacent-normal breast tissue expression from TCGA, and also simulated 500 MVN datasets from normal breast tissues to examine  
113 the false discovery rate (FDR) of drug selection against an incremental matched set of random ‘matched-controls’ (M=2, 4, 8, or 16) within each  
114 set (Supplementary Methods for details). We evaluated FPR under three scenarios of varying levels of correlation between the drug-gene networks  
115 and the gene-gene networks: Sc1) all gene-gene and drug-gene networks; Sc2) reduced gene-gene networks, complete drug-gene networks; and  
116 Sc3) reduced gene-gene and reduced drug-gene networks. We describe the justification for these scenarios in more detail in the Supplementary  
117 Methods, where the binary clustering of the gene-gene and drug-gene networks are illustrated in Figures S2 and S3, respectively.

#### 118 *True Positive Rate (TPR) Simulations*

119 Using the same MVN simulation framework as the FPR simulations, we changed the mean expression level for a subset of genes for the cases, but  
120 not the matched-controls. Here, we chose three subsets of genes that are targeted differently by the Olaparib drug-gene network: Set-A) the

121 complete drug-gene network for Olaparib; Set-B) a small network of BRCA2-specific genes, and Set-C) a mixture of genes that are sub-networks  
122 of the ATM/ATR networks, which are larger than the BRCA2 network (Details in Supplementary Methods).

### 123 *Validation of PANOPLY's Drug Predictions With PDXs*

124 To validate PANOPLY's drug predictions, we tested PDX models obtained from BEAUTY study (BC\_051\_1\_1) for a TNBC patient whose tumor  
125 did not respond to neoadjuvant paclitaxel and anthracycline/cyclophosphamide treatment. PDX tumors created with pre- and post-treatment  
126 samples were studied in female NOD-SCID mice. The tumors were grown to 200–250 mm<sup>3</sup>, and then the mice were randomized (7 per group) into  
127 olaparib (15 mg/kg, once daily) or vehicle treatment groups. Mouse tumor size and body weight were measured twice per week, and mice were  
128 euthanized after 12 days of treatment. The difference in volume between drug- and vehicle-treated tumors was assessed using Wilcoxon rank-sum  
129 tests.

### 130 *Mining multiple patient reports*

131 We performed PANOPLY on a group of patients and applied clustering techniques to the results from the patient reports to identify a subset of  
132 patients and drugs that could fit into an on-going bucket trial. We applied non-negative matrix factorization (NMF) (38) to prioritized drugs for the  
133 cases using percentile ranking based on the combination of the RF.score and P.score. The clusters were evaluated by assessing the cophenetic and  
134 average silhouette scores, and drugs are assessed using Kim's method (38) to select the most delineating drugs. A word cloud of genes is  
135 generated using the genomic targets of the clusters of drugs associated with the top 10% of delineating drugs.

136



## 137 **RESULTS**

### 138 **Statistical Performance of PANOPLY Using Simulated Data**

139 We evaluated the FDR of PANOPLY's network tests using simulated data constructed following the mean and covariance structure of 20 healthy  
140 breast samples. Baseline performance was estimated using the complete curated-cancer network; while we evaluated reduced networks to  
141 establish the underlying bias in the network, arising from drug labeling and target annotation which result in redundant gene targets of anti-cancer  
142 therapies.

143 *FPR (Type I error):* We evaluated FPR by using both simulated and TCGA non-cancer tissue samples. We observe in Supplementary Figure S4  
144 the FPR for DNT, DMT, and P.score are controlled near the nominal  $\alpha = 0.05$  and 0.01 levels under a typical analysis with PANOPLY. We  
145 evaluated three scenarios (Sc1-Sc3) with varying correlation of the gene-gene and drug-gene networks and with varying matched-control set sizes  
146  $M=2, 4, 8,$  and 16. A full explanation of these scenarios (Sc1-Sc3) and results are included in the Supplementary Methods. We show in Table 1A,  
147 the results for  $M=8$  for DNT and DMT for all scenarios with the two datasets. The FPRs is slightly higher in the TCGA breast cancer normal-  
148 adjacent samples than the simulated MVN set. The DNT error rates are adequate for all three simulations scenarios Sc1-Sc3, but perhaps too  
149 conservative in Sc2 and Sc3. The DMT was observed to be higher than the nominal levels in all scenarios Sc1-Sc3 in both datasets but is much  
150 closer to the nominal level when the correlation cancer gene networks are reduced in both Sc2 and Sc3. In summary, the suggested setting for  
151 running the workflow is scenario Sc2, where only the patient-specific events are considered for testing all 374 drugs.

152 *TPR (Statistical Power):* We similarly evaluated the TPR of the Panoply workflow using just the simulated MVN data, by spiking in increased  
153 amounts of expression for a subset of genes in the Olaparib gene-drug network. We quantify power as the proportion of simulated datasets for

154 which the DNT and DMT p-values for Olaparib are significant in two ways: the p-value is less than  $\alpha = 0.05$ , and the p-value is one of the ten  
155 lowest of all drugs. As shown in Table 1B for  $M=8$ , the  $\alpha = 0.05$  power scores for DNT and DMT are comparable with Gene Set-A while DNT  
156 power dramatically drops off with more realistic network-specific gene-gene networks that are activated (Gene Sets B and C), as  
157 expected. Complete results for DNT, DMT, and P.score are discussed in the Supplementary Material. Supplementary Figures S5 and S6 show  
158 the TPR is robust to the size of the reference sample population ( $M=2, 4, 8, \text{ and } 16$ ), the top-10 metric verifies the  $\alpha = 0.05$  TPR rates, and that  
159 P.score is useful in ranking drugs that perform well across DNT or DMT.

## 160 **N=1 Case Study**

161 We applied PANOPLY workflow to prioritize drugs for a BEAUTY patient (case BC\_051\_1\_1) who did not respond to neoadjuvant  
162 chemotherapy for whom a set of matched controls ( $n=9$ ) were found among the BEAUTY TNBC patients who had a pathologic complete response  
163 (pCR) to neoadjuvant chemotherapy. The PANOPLY report for that patient is available in the Supplementary (file-  
164 Supplementary\_PANOPLY\_BEAUTY\_Patient\_Report.pdf). Below we have (1) the experimental validation of a PANOPLY-prioritized drug  
165 using PDX models and (2) comparison of PANOPLY analysis for a BC\_051\_1 patient with other methods.

166 *1. Experiment validation:* Somatic, germline mutations, CNA, gene expression, and expressed mutation data for the case was compared and  
167 contrasted with her matched controls using PANOPLY workflow. (Resulting tables for case: BC\_051\_1\_1 are discussed in detail in the  
168 Supplementary Results). The PANOPLY results indicated that olaparib was the most promising drug for this patient (Table 2). Figure 2A  
169 shows histologic images of the case's tumor and a corresponding PDX, both from the pre-NAC and post-NAC time points. Pre- and post-  
170 NAC patient tumor, and its corresponding PDX had similar morphologic features and a triple negative staining pattern (Figure 2A). For  
171 both the pre-NAC and post-NAC PDXs, tumor volume at day 12 was significantly lower in the olaparib group than in the vehicle group

172 (Wilcoxon rank sum test  $P=0.04$  and  $p < 0.001$  respectively; Figure 2B). The PDX results show promise that this approach may be  
173 successful in identifying an effective therapy for patients.

174 *2. Comparison of PANOPLY with existing methods:* Recent bioinformatics software, such as iCages and oncorep, attempt to incorporate a  
175 tabulation of anti-cancer drug options targeting observed driver genes. These softwares were developed independently and with their own  
176 design assumptions and intent. Table 3 presents a summary of these two software implementations, in comparison to Panoply. We were able  
177 to generate a similar iCages report with default settings for case BC\_051\_1\_1, by providing required somatic mutation (VCF format) and the  
178 copy number alteration data (BED format). We were not able to configure the current architecture of the Amazon web services, required for  
179 the omics\_pipe workflow (which precedes the oncorep analysis module).

## 180 **Extensibility of the Workflow to Cohort Studies and Public Domain Datasets**

181 *PANOPLY Drug Predictions for Patients with Chemo-resistant, TNBC cohort:* Panoply provides a prioritized drug list for each patient in the  
182 cohort. This list corresponds to a unique set of gene targets for each patient, which can be compared and contrasted with similar chemo-resistant  
183 patients using existing clustering methods. The genomic characteristics of these clusters can be reverse engineered to find qualifying genomic  
184 events which would qualify future patients for drug ‘bucket’ trials. An illustration of this application of PANAPOLY is provided using the 17  
185 BEAUTY patients with chemoresistant TNBC. NMF clustering<sup>32</sup> was performed with the drug priority scores of these 17 cases. Based on the  
186 cophenetic and average silhouette scores, two clusters were selected to be optimal. The percentile ranking of top 10% (35/344) drugs was  
187 aggregated per sample cluster using the median score and presented as a heatmap (Figure 3A). The target genes of the drug clusters were collated,  
188 and a word cloud was generated with the targets (Figure 3B). As shown in Figure 3A, the cluster 1 consists of nine samples; the patients in that

189 group primarily consist of kinase-inhibitors as their top prioritized drugs (drugs=16) and the drugs in that cluster can predominantly target the  
190 PIK3CA-mTOR-AKT signaling pathways. The other cluster from Figure 3A consists of a set of prioritized drugs (drugs=19) for eight patients, as  
191 shown in Figure 3B these drugs can primarily target genes associated with cell cycle control, specifically targeting the histone deacetylases  
192 (*HDAC1*) and the Aurora kinases A and B.

193 *PANOPLY drug predictions for public dataset such as TCGA with molecular and clinical data:* In here, we present the capability of PANOPLY  
194 workflow to be executed with publically available datasets. An example COAD patient's (TCGA-AA-3488) report is discussed briefly below and  
195 can be obtained from Supplementary\_PANOPLY\_TCGA\_COAD\_Patient\_Report.pdf. The case displayed 645 driver genes: 226 CNAs not  
196 present in the case; in addition, 419 genes were over-expressed in the case tumor sample relative to the matched-control samples. Of the 226  
197 CNAs, 113 were amplifications, and 113 were deletions. Of those BRAF, CDKN2A, CDKN2B, FGF10, IL7R, INHBA, JAK2, KEL, MAFA,  
198 NTRK1, NTRK2, PIK3CA, PRSS1, RBL1, SKIL, SMO, SOX2 and SPTA1 cancer-related genes were both amplified and overexpressed. Of the  
199 case's 645 events, 53 genes are differentially expressed between the case and matched-controls and can be targeted by antineoplastic drugs. Based  
200 on the network and random forest analysis of driver genes and gene expression data, PANOPLY ranked the following drugs lestaurtinib (JAK2,  
201 NTRK1, NTRK2), LY2784544 (JAK2), GDC-0032(PIK3CA), NVP-BGT226 (MTOR, PIK3CA), regorafenib (MAPK11, RAF1, BRAF, KRAS,  
202 KIT, FGFR1/2,PDGFRA/B, ARAF, KDR, EPHA2, ABL1, NTRK1, CYP3A4, CYP2C8/9, CYP2B6, CYP2C19,ABCB1, ABCG2,  
203 UGT1A1/9,FLT1/4, RET, TEK and DDR2) and ARQ736 (BRAF) as significant for patient TCGA-AA-3488 with significant P.score and RF.score  
204 (Table 4).

205 Similarly, we have also applied PANOPLY to TCGA breast cancer data (BRCA), and the exemplary report was prepared for a TCGA tumor  
206 (TCGA-AR-A1AR) sample and is presented in the **Supplementary**.

## 207 **DISCUSSION**

208 In creating PANOPLY, our goal was to develop a flexible workflow capable of analyzing multiple forms of -omics and clinical data to identify  
209 driver genes, their effects on gene networks and the drugs capable of targeting altered gene networks in cancer patients. Using gene expression  
210 data, CNA, and DNA variants from publicly available and in-house datasets, we demonstrate that PANOPLY holds promise in identifying agents  
211 capable of targeting driver gene-induced changes, both for individual patients and for subgroups of patients that share a cancer subtype and  
212 response pattern. This is evident in the example where PANOPLY's prioritization of olaparib as a promising treatment for a patient with  
213 chemoresistant TNBC and that agent was found to reduce tumor size when applied to that patient's xenografts. When the same patient's data was  
214 run through iCages, the drug with the highest iCageDrugScore (0.52) was Doxorubicin, the drug administered as part of the patient's NAC  
215 regimen that failed produce a pCR. While Olaparib scored ( $1.3 \times 10^{-4}$ ) much lower among potential agents. Doxorubicin intercalates DNA and  
216 thereby indirectly targets TP53 (TOP2A), which is observed in a substantial proportion of cancer patients. Co-considering associated genes  
217 involved with DNA damage repair and/or active cellular uptake would presumably provide a more accurate prediction of drug efficacy, as  
218 implemented by Panoply.

219 The PANOPLY workflow currently analyzes the patient's molecular and clinical data together along with the knowledge databases such as  
220 Reactome, DGI-db, and others for drug-gene network analysis. This represents a substantial advancement relative to existing programs, such as  
221 XSeq<sup>19</sup>, OncoRep<sup>20</sup>, and OncoIMPACT<sup>21</sup>, which integrate only molecular data such as somatic mutations or CNAs, and gene expression.  
222 Currently, medical oncologists have access to genomics reports generated a limited target panel for decision making. Working closely with  
223 clinicians, basic scientists, and pharmacologists, we have developed PANOPLY to integrate molecular, clinical, and drug data to prioritize targets

224 and facilitate individualized treatment for the patients. Using clinical and molecular profiles of the patient's disease, PANOPLY provides a  
225 personalized list of prioritized drugs along with links to literature concerning drug efficacy. The oncologist will still have to go through the list and  
226 refine drug selection based on the inherent clinical knowledge, ancillary clinical trials, and insurance coverage availability. Another limitation of  
227 PANOPLY is that the method cannot delineate the clinical effectiveness of a similar class of drugs. We plan to accomplish this in future by  
228 bringing in drug knowledge such as chemical structure, molecular size, and drug dosage. Our method is dependent on drug-gene target annotations  
229 that are heavily biased by product literature and databases. Moreover, clinical translation of PANOPLY results is constrained by the cost-  
230 effectiveness in developing PDXs for drug validation.

231 PANOPLY is a flexible framework that can integrate many other types of -omics data, including protein expression, methylation expression,  
232 structural variants, circular RNAs, long non-coding RNAs, and fusion data with modifications to its code. PANOPLY's framework can also be  
233 extended to the metastatic setting; additional clinical data such as prior exposure to drugs, features of primary and recurrence disease would be  
234 required. Additional genomics data sets are needed to modify the existing approach for metastatic tumors.

235 As more is learned about the molecular underpinning of cancer using various resources, we plan to expand our knowledge base to improve  
236 PANOPLY's predictions using PDX and cell-lines. We have validated PANOPLY's predictions in a single patient at present using PDXs, in  
237 future, we plan to validate PANOPLY-predicted drugs in PDXs derived from additional patients. Like several other groups and we have shown,  
238 PDX models faithfully represent tumor biology<sup>26,33</sup>, so these results should provide insight into PANOPLY's reliability. In conclusion, our results  
239 indicate that combining multiple sources of -omics and clinical data to predict promising agents for a patient or groups of patients with cancer is  
240 feasible. With further validations, PANOPLY can be a tool to help clinicians in their decision-making process.

241 **ACKNOWLEDGEMENTS**

242

243 KRK, JPS, KJT, XT, EEC, JY, PTV, JNI, RMW, LW, JCB, MPG, and VJS are funded in part by the Mayo Clinic Center for  
244 Individualized Medicine. KRK, RMW, LW, MPG, JNI, and VJS are funded in part by the Mayo Clinic Breast Specialized Program of  
245 Research Excellence (SPORE) (P50CA116201). MPG and VJS are funded in part by the Mayo Comprehensive Cancer Center Grant  
246 (P30CA 15083-43). KRK, JS, KJT, XT, EEC, and PTV are funded by the Division of Biostatistics and Informatics at the Mayo Clinic.

247

248 **REFERENCES**

- 249 1. CDC: Leading causes of death, 2015  
250 2. Perez EA, Reinholz MM, Hillman DW, et al: HER2 and chromosome 17 effect on patient outcome in the N9831 adjuvant  
251 trastuzumab trial. *Journal of clinical oncology : official journal of the American Society of Clinical Oncology* 28:4307-15, 2010  
252 3. Perez EA, Dueck AC, McCullough AE, et al: Predictability of adjuvant trastuzumab benefit in N9831 patients using the ASCO/CAP  
253 HER2-positivity criteria. *Journal of the National Cancer Institute* 104:159-62, 2012  
254 4. Gambacorti-Passerini C, Antolini L, Mahon F, et al: Multicenter independent assessment of outcomes in chronic myeloid  
255 leukemia patients treated with imatinib. *J Natl Cancer Inst* 103:553-61, 2011  
256 5. Chapman P, Hauschild A, Robert C, et al: Improved survival with vemurafenib in melanoma with BRAF V600E mutation. *N Engl J*  
257 *Med* 364:2507-16, 2011  
258 6. Mok T, Wu Y, Thongprasert S, et al: Gefitinib or caboplatin-paclitaxel in pulmonary adenocarcinoma *N Engl J Med* 361:947-57,  
259 2009  
260 7. Kwak E, Bang Y, Camidge D, et al: Anaplastic lymphoma kinase inhibition in non-small-cell lung cancer. *N Engl J Med* 363:1693-  
261 703, 2010  
262 8. Dong Z, Zhang N, Li C, et al: Anticancer drug sensitivity prediction in cell lines from baseline gene expression through recursive  
263 feature selection. *BMC cancer* 15:489, 2015  
264 9. Zhang N, Wang H, Fang Y, et al: Predicting Anticancer Drug Responses Using a Dual-Layer Integrated Cell Line-Drug Network  
265 Model. *PLoS computational biology* 11:e1004498, 2015  
266 10. Qin Y, Conley AP, Grimm EA, et al: A tool for discovering drug sensitivity and gene expression associations in cancer cells. *PLoS*  
267 *one* 12:e0176763, 2017  
268 11. Geeleher P, Cox NJ, Huang RS: Cancer biomarker discovery is improved by accounting for variability in general levels of drug  
269 sensitivity in pre-clinical models. *Genome biology* 17:190, 2016

- 270 12. Meric-Bernstam F, Johnson A, Holla V, et al: A decision support framework for genomically informed investigational cancer  
271 therapy. *Journal of the National Cancer Institute* 107, 2015
- 272 13. Yeh P, Chen H, Andrews J, et al: DNA-Mutation Inventory to Refine and Enhance Cancer Treatment (DIRECT): a catalog of  
273 clinically relevant cancer mutations to enable genome-directed anticancer therapy. *Clinical cancer research : an official journal of the American*  
274 *Association for Cancer Research* 19:1894-901, 2013
- 275 14. Van Allen EM, Wagle N, Stojanov P, et al: Whole-exome sequencing and clinical interpretation of formalin-fixed, paraffin-  
276 embedded tumor samples to guide precision cancer medicine. *Nature medicine* 20:682-8, 2014
- 277 15. Cerami E, Gao J, Dogrusoz U, et al: The cBio cancer genomics portal: an open platform for exploring multidimensional cancer  
278 genomics data. *Cancer discovery* 2:401-4, 2012
- 279 16. Forbes SA, Beare D, Gunasekaran P, et al: COSMIC: exploring the world's knowledge of somatic mutations in human cancer.  
280 *Nucleic acids research* 43:D805-11, 2015
- 281 17. Bashashati A, Haffari G, Ding J, et al: DriverNet: uncovering the impact of somatic driver mutations on transcriptional networks  
282 in cancer. *Genome biology* 13:R124, 2012
- 283 18. Gundem G, Perez-Llamas C, Jene-Sanz A, et al: IntOGen: integration and data mining of multidimensional oncogenomic data.  
284 *Nature methods* 7:92-3, 2010
- 285 19. Ding J, McConechy MK, Horlings HM, et al: Systematic analysis of somatic mutations impacting gene expression in 12 tumour  
286 types. *Nature communications* 6:8554, 2015
- 287 20. Meissner T, Fisch KM, Gioia L, et al: OncoRep: an n-of-1 reporting tool to support genome-guided treatment for breast cancer  
288 patients using RNA-sequencing. *BMC medical genomics* 8:24, 2015
- 289 21. Bertrand D, Chng KR, Sherbaf FG, et al: Patient-specific driver gene prediction and risk assessment through integrated network  
290 analysis of cancer omics profiles. *Nucleic acids research* 43:e44, 2015
- 291 22. Dong C, Guo Y, Yang H, et al: iCAGES: integrated CAnceR GEnome Score for comprehensively prioritizing driver genes in personal  
292 cancer genomes. *Genome medicine* 8:135, 2016
- 293 23. Radovich M, Clare SE, Atale R, et al: Characterizing the heterogeneity of triple-negative breast cancers using microdissected  
294 normal ductal epithelium and RNA-sequencing. *Breast Cancer Research and Treatment* 143:57-68, 2014
- 295 24. Wilks C, Cline MS, Weiler E, et al: The Cancer Genomics Hub (CGHub): overcoming cancer through the power of torrential data.  
296 *Database : the journal of biological databases and curation* 2014, 2014
- 297 25. Goetz MP, Kalari KR, Suman VJ, et al: Tumor sequencing and patient-derived xenografts in the neoadjuvant treatment of breast  
298 cancer. *JNCI: Journal of the National Cancer Institute* 109, 2017
- 299 26. Yu J, Qin B, Moyer AM, et al: Establishing and characterizing patient-derived xenografts using pre-chemotherapy percutaneous  
300 biopsy and post-chemotherapy surgical samples from a prospective neoadjuvant breast cancer study. *Breast cancer research : BCR* 19:130, 2017
- 301 27. Frampton GM, Fichtenholtz A, Otto GA, et al: Development and validation of a clinical cancer genomic profiling test based on  
302 massively parallel DNA sequencing. *Nature biotechnology* 31:1023-31, 2013



- 303           28.     Peter T. Vedell EWK, Gavin R. Oliver, Krishna R. Kalari, Steven N. Hart, Jean-Pierre A. Kocher, Hugues Sicotte Identification of  
304 Genes Implicated in Tumorigenesis for Interpretation of Tumor Genomes Individualizing Medicine Conference. Rochester, MN, USA, 2013
- 305           29.     Hart SN, Ellingson MS, Schahl K, et al: Determining the frequency of pathogenic germline variants from exome sequencing in  
306 patients with castrate-resistant prostate cancer. *BMJ open* 6:e010332, 2016
- 307           30.     Croft D, Mundo AF, Haw R, et al: The Reactome pathway knowledgebase. *Nucleic acids research* 42:D472-7, 2014
- 308           31.     Wagner AH, Coffman AC, Ainscough BJ, et al: DGIdb 2.0: mining clinically relevant drug-gene interactions. *Nucleic acids research*  
309 44:D1036-44, 2016
- 310           32.     Mirzal A: Nonparametric Tikhonov Regularized NMF and Its Application in Cancer Clustering. *IEEE/ACM transactions on*  
311 *computational biology and bioinformatics* 11:1208-17, 2014
- 312           33.     Hou J, Wang L: FKBP5 as a selection biomarker for gemcitabine and Akt inhibitors in treatment of pancreatic cancer. *PloS one*  
313 7:e36252, 2012

314

315

316

317 **Table 1A.** FPR rates for DNT and DMT test p-values at  $\alpha = 0.05$  using simulated MVN (500 sets) and TCGA normal-adjacent data  
 318 (94 sets), for matched control size  $M=8$ , and scenarios Sc1-Sc3

| Scenario                                      | Drivers      Drugs |     | Test | False Positive Rate |       |
|-----------------------------------------------|--------------------|-----|------|---------------------|-------|
|                                               |                    |     |      | Null                |       |
|                                               |                    |     |      | MVN                 | TCGA  |
| Sc1: All Driver Genes and Drugs               | 429                | 374 | DNT  | 0.029               | 0.04  |
|                                               |                    |     | DMT  | 0.231               | 0.208 |
| Sc2: Patient Observed Driver Genes, all Drugs | 120                | 374 | DNT  | 0.031               | 0.038 |
|                                               |                    |     | DMT  | 0.065               | 0.104 |
| Sc3: Reduced Correlation Drivers and Drugs    | 175                | 117 | DNT  | 0.008               | 0.01  |
|                                               |                    |     | DMT  | 0.08                | 0.088 |

319 **Table 1B.** TPR rates of finding Olaparib as a drug target from DNT and DMT test p-values at  $\alpha = 0.05$  using simulated MVN (500  
 320 sets) data for matched control size  $M=8$ , scenarios Sc1 and Sc2, and up-regulated gene sets A, B, and C.

| Simulation Scenario                          | Drivers      Drugs |     | Test | True Positive Rate (Power) |            |            |            |            |            |
|----------------------------------------------|--------------------|-----|------|----------------------------|------------|------------|------------|------------|------------|
|                                              |                    |     |      | Set A                      |            | Set B      |            | Set C      |            |
|                                              |                    |     |      | MVN (sd 2)                 | MVN (sd 3) | MVN (sd 2) | MVN (sd 3) | MVN (sd 2) | MVN (sd 3) |
| S1: All Driver Genes and Drugs               | 429                | 374 | DNT  | 0.582                      | 0.926      | 0.030      | 0.062      | 0.108      | 0.294      |
|                                              |                    |     | DMT  | 0.522                      | 0.588      | 0.496      | 0.542      | 0.498      | 0.544      |
| S2: Patient Observed Driver Genes, all Drugs | 120                | 374 | DNT  | 0.612                      | 0.942      | 0.038      | 0.082      | 0.132      | 0.286      |
|                                              |                    |     | DMT  | 0.390                      | 0.410      | 0.320      | 0.326      | 0.528      | 0.590      |



322 **Table 2:** Top drugs recommended by PANOPLY for BEAUTY patient (BC\_051\_1\_1) with  
 323 chemoresistant triple-negative breast cancer and PDX model.

| Drug     | Case Driver Genes <sup>a</sup> | Number of Pathways <sup>b</sup> | P.score  | RF.score |
|----------|--------------------------------|---------------------------------|----------|----------|
| OLAPARIB | ATR,ATM,BRCA2,BRCA1            | 43                              | 3.009632 | 0.003743 |
| BMN673   | ATR,ATM,BRCA2,BRCA1            | 32                              | 2.70456  | 0.004679 |
| AMG900   | AURKB,AURKA                    | 8                               | 2.610079 | 0.001857 |
| AZD7762  | CHK1,CHK2                      | 13                              | 2.566379 | 0.001786 |

bioRxiv preprint doi: <https://doi.org/10.1101/276598>; this version posted March 12, 2018. The copyright holder for this preprint (which was not certified by peer review) is the author/funder, who has granted bioRxiv a license to display the preprint in perpetuity. It is made available under aCC-BY 4.0 International license.

324 <sup>a</sup> Genes on PANOPLY's cancer gene list that are targeted by FDA-approved drugs  
 325 <sup>b</sup> Number of pathways that may be affected, based on drug-gene target interactions  
 326

327 **Table 3:** Comparison of oncorep, iCAGES and Panoply methods

|                                                      | oncorep   | iCAGES                    | Panoply             |
|------------------------------------------------------|-----------|---------------------------|---------------------|
| Single Patient Analysis                              | ✓         | ✓                         | ✓                   |
| Pre-compiled Reference Population                    | ✓         | ✓                         |                     |
| Driver Gene Identification                           | ✓         | ✓                         | ✓                   |
| Driver Gene Prioritization                           |           | ✓                         | ✓                   |
| Multiple RNA features (eSNV, fusion, mutations, etc) | Derived   |                           | Optionally Provided |
| Data Input                                           | RNA-Seq   | Somatic, Copy number data | Multi-omics         |
| Drug Association                                     | ✓         | ✓                         | ✓                   |
| Drug Prioritization                                  |           | ✓                         | ✓                   |
| Machine Learning                                     |           | ✓                         | ✓                   |
| Summary Report                                       | ✓         | ✓                         | ✓                   |
| Pathway Analysis                                     | ✓         |                           |                     |
| Network Analysis                                     |           | ✓                         | ✓                   |
| Breast Cancer Specific                               | ✓         |                           |                     |
| Installation ease                                    | Difficult | Easy                      | Easy                |
| Extensibility                                        | Moderate  | Low                       | High                |

328  
 329  
 330  
 331  
 332  
 333  
 334

335 **Table 4.** PANOPLY alternate drug predictions for Colon Cancer TCGA Patient (TCGA-AA-  
 336 3488) based on molecular data.

| Drug         | Case Driver Genes <sup>a</sup> | Number of Pathways <sup>b</sup> | P.score | RF.score |
|--------------|--------------------------------|---------------------------------|---------|----------|
| LESTAURTINIB | JAK2,NTRK1,NTRK2               | 25                              | 4.9153  | 0.0014   |
| LY2784544    | JAK2                           | 21                              | 4.2668  | 0.0017   |
| GDC-0032     | PIK3CA                         | 49                              | 4.1257  | 0.0022   |
| NVP-BGT226   | PIK3CA,MTOR                    | 67                              | 3.9725  | 0.0019   |
| REGORAFENIB  | KIT,KRAS,FLT4,NTRK1            | 166                             | 3.1395  | 0.0018   |
| ARQ736       | BRAF                           | 23                              | 3.0511  | 0.0025   |

bioRxiv preprint doi: <https://doi.org/10.1101/281096>; this version posted March 16, 2018. The copyright holder for this preprint (which was not certified by peer review) is the author/funder, who has granted bioRxiv a license to display the preprint in perpetuity. It is made available under aCC-BY 4.0 International license.

337 <sup>a</sup> Genes on PANOPLY's cancer gene list that are targeted by anti-cancer drugs

338 <sup>b</sup> Number of pathways that may be affected, based on drug-gene target interactions

339

340

341

342

343

344

345

346

347

348

349

350

351

352

353

# Patient-Specific Multi-Omics Integration Analysis

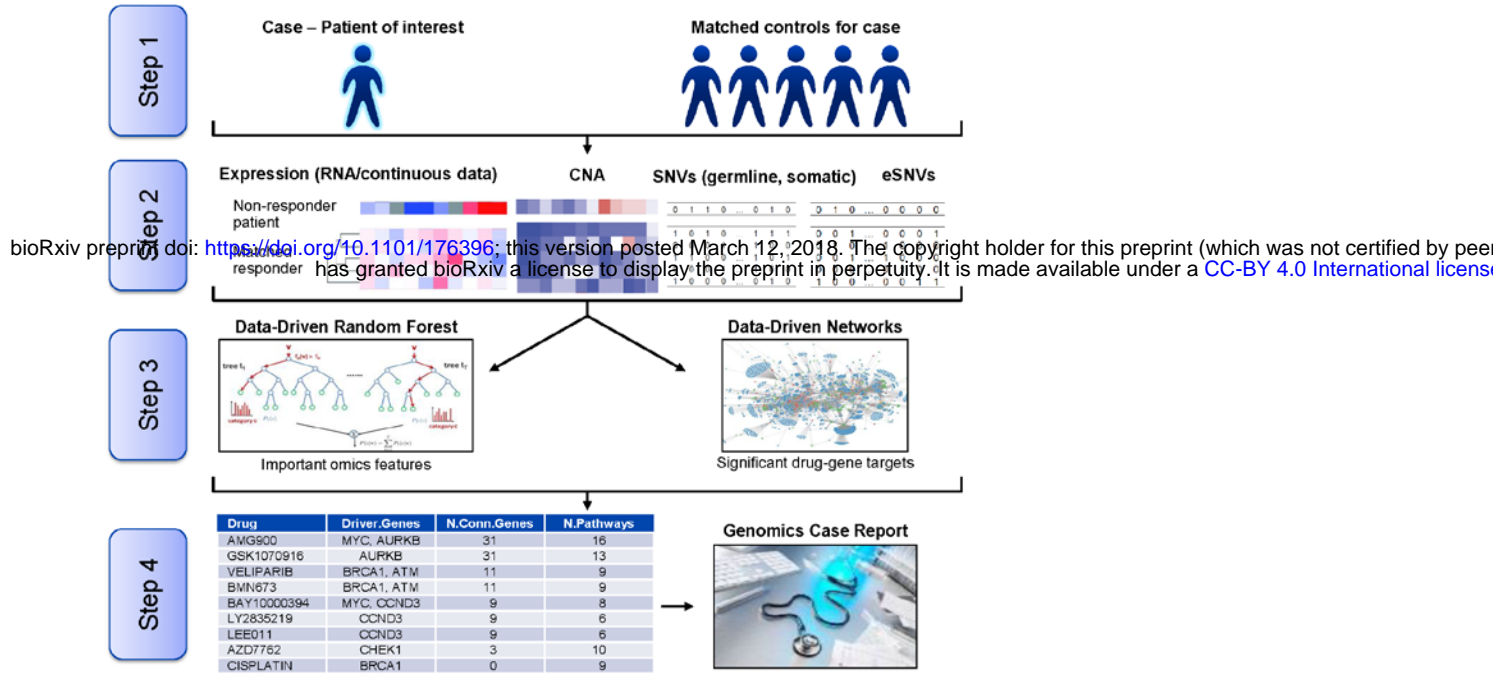

354

355 **Figure 1. A high-level overview of PANOPLY.** Step 1: A patient of interest is compared with matched-controls.  
 356 Step 2: For each subject, gene expression data, copy number alteration (CNA), single nucleotide variant (SNV), and  
 357 expressed single nucleotide variant (eSNV) data will be provided to identify case-specific driver alterations. Step 3:  
 358 Multi-omics data will be provided to the random forest and network analysis methods to identify the top prioritized  
 359 drugs to target genes that are driving oncogenesis in the patient. Step 4: A genomics case report listing the drugs to  
 360 prioritize, based on their ability to target driver mutations and their dysregulated gene networks, is generated for  
 361 researchers and clinicians.

362

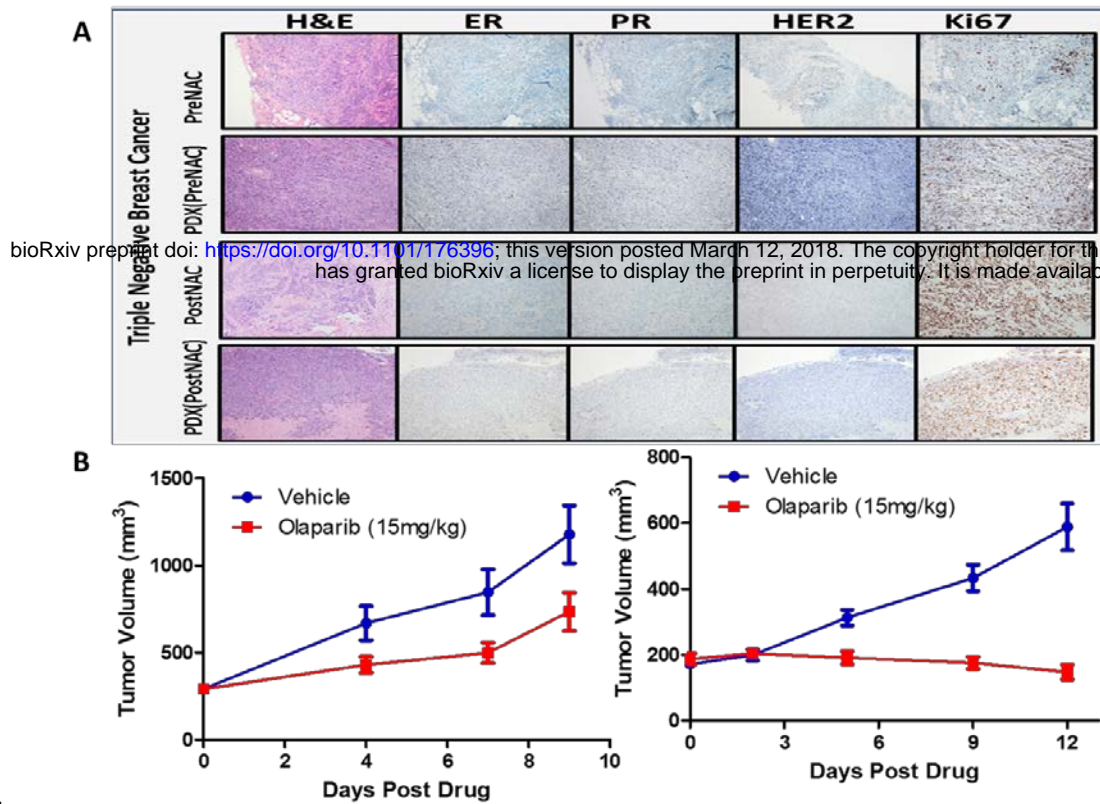

364

365 **Figure 2. Patient-derived xenografts (PDXs) validate PANOPLY's prediction that olaparib is an effective**  
 366 **treatment for a patient with chemoresistant TNBC (BC\_051\_1\_1).** A) The top panel shows histological stains of  
 367 the patient's tumor and PDXs (pre or post-treatment). B) Cytotoxicity data shows the PDXs response to the top  
 368 predicted drug olaparib compared to the no treatment (the left plot shows the olaparib drug response data from pre-  
 369 treatment mice, whereas the data from the right shows the data from post-treatment PDX models. Both the datasets  
 370 were generated using the Vehicle as controls).

371

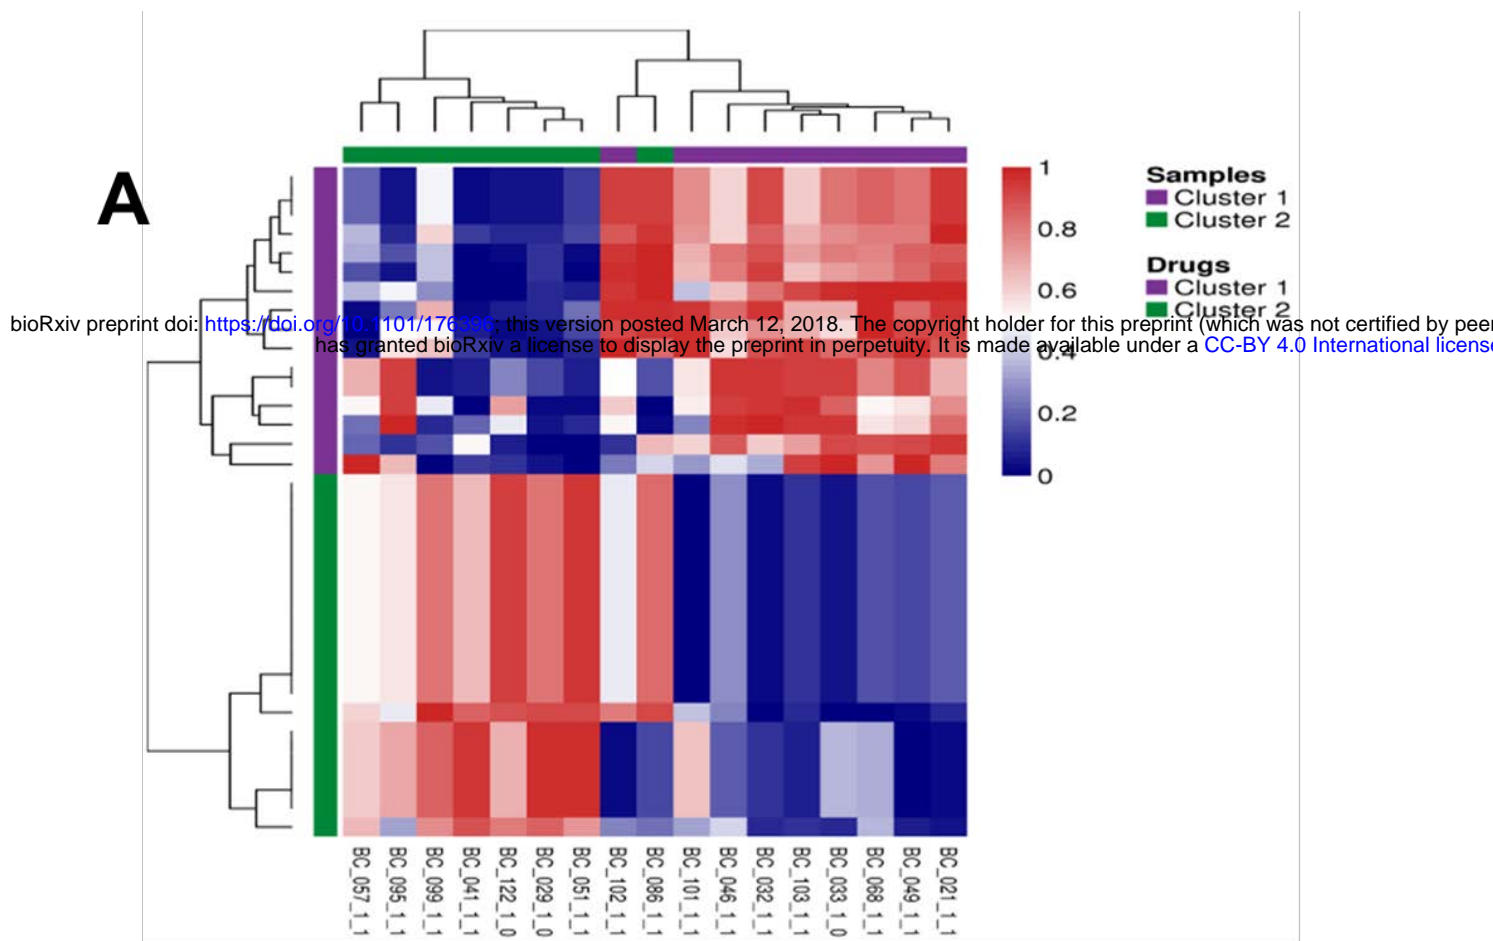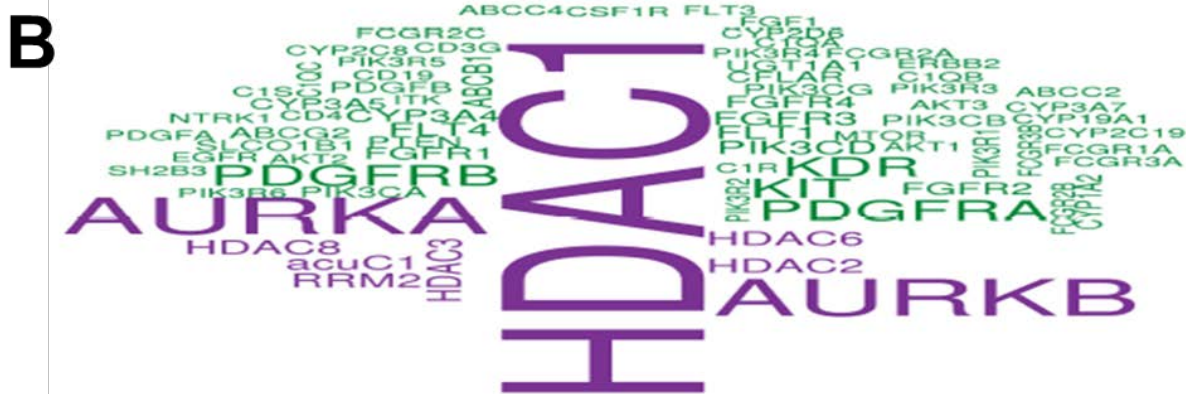

372  
 373 **Figure 3. Clustering and word cloud plots of 17 TNBC chemotherapy-resistant patients.** A) Two-way  
 374 hierarchical clustering of the top 10% of the drugs predicted by PANOPLY for 17 basal TNBC patients. The  
 375 heatmap shows that there are two sample and drug clusters are implicated in the NMF clustering analysis. B) Word  
 376 cloud of the target genes from the two drug clusters predicted by the NMF analysis.  
 377
